# Supplementary material for: Protective Effect of the Polyphenol Ligustroside on Colitis Induced with Dextran Sulfate Sodium in Mice
Source: MDPI journal article supplement (doi:10.3390/nu16040522), 2024-02-13
Supplement: s1 [file s1]

Supplementary Materials

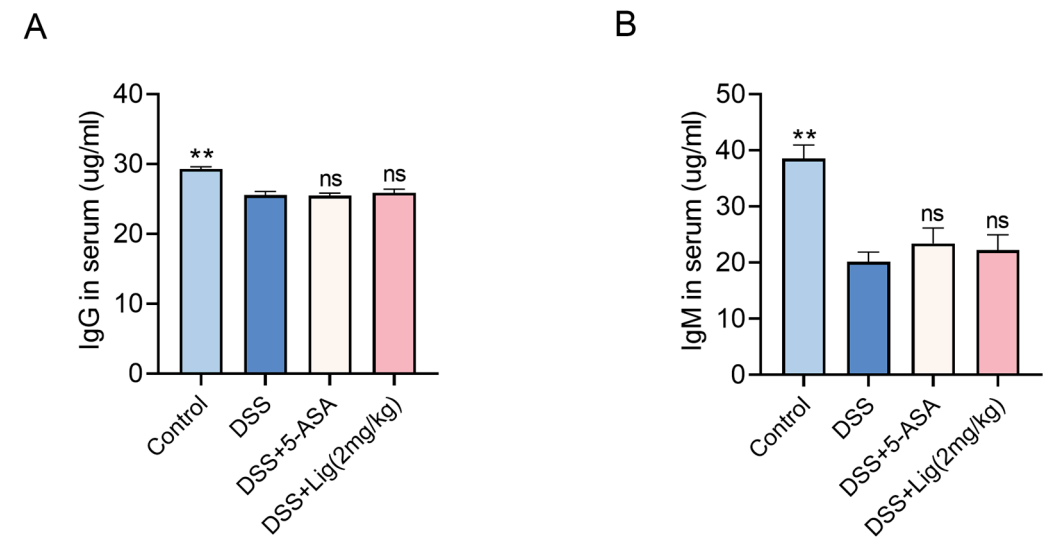

**Supplementary Figure S1.** The concentrations of IgG (**A**) and IgM (**B**) in serum. Data were presented as means  $\pm$  SEM. \*  $p < 0.05$  and \*\*  $p < 0.01$  vs. DSS group, ns means  $p > 0.05$  vs. DSS group,  $n = 5$ .

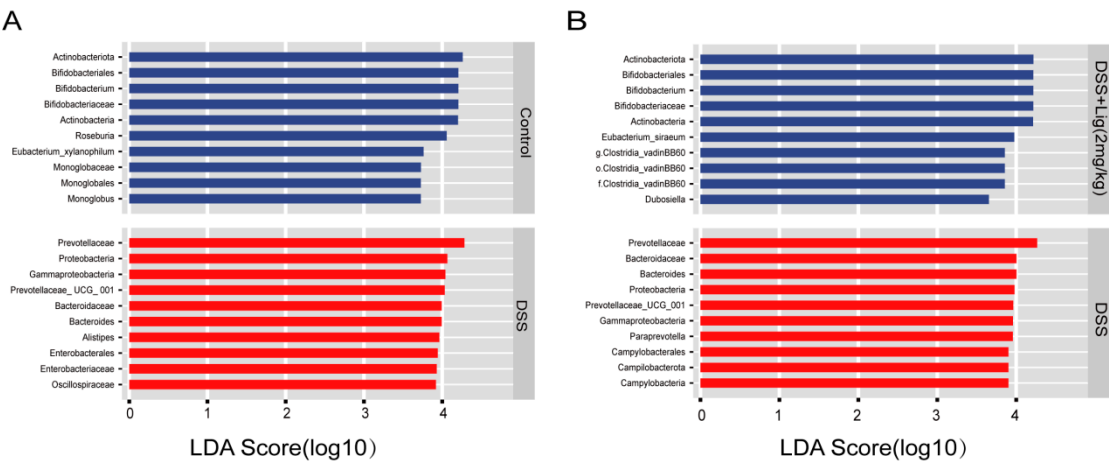

**Supplementary Figure S2.** Top ten Linear discriminant analysis (LDA) score for different taxa abundances (**A**) between control and DSS groups and (**B**) between DSS + Lig (2 mg/kg) and DSS groups,  $n = 5$ .

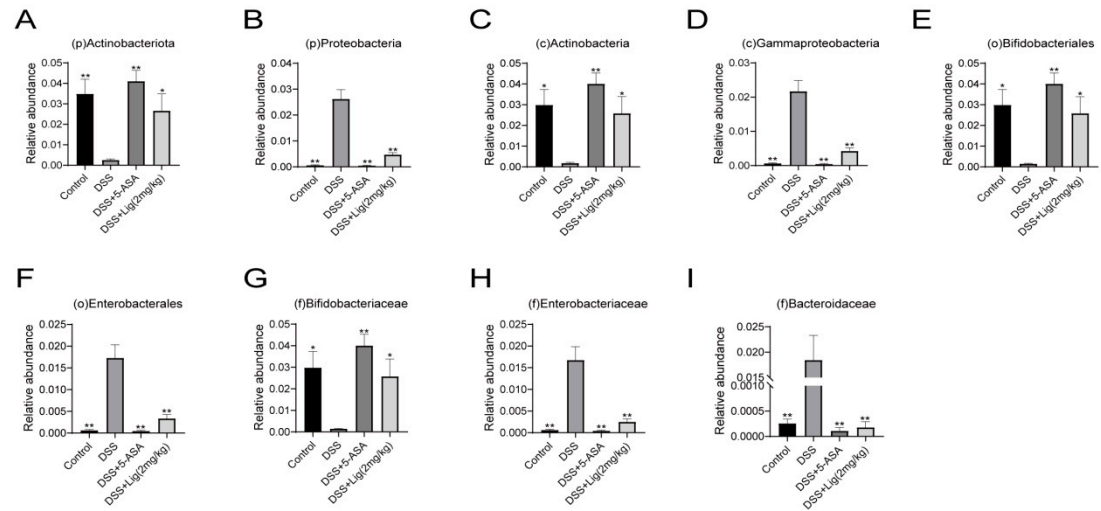

**Supplementary Figure S3.** Relative abundance of predominant bacteria is shown for the phylum (A,B), class (C,D), order (E,F) and family (G–I) levels. Data are presented as means  $\pm$  SEM. \*  $p < 0.05$  and \*\*  $p < 0.01$  vs. DSS group, ns means  $p > 0.05$  vs. DSS group,  $n = 5$ .

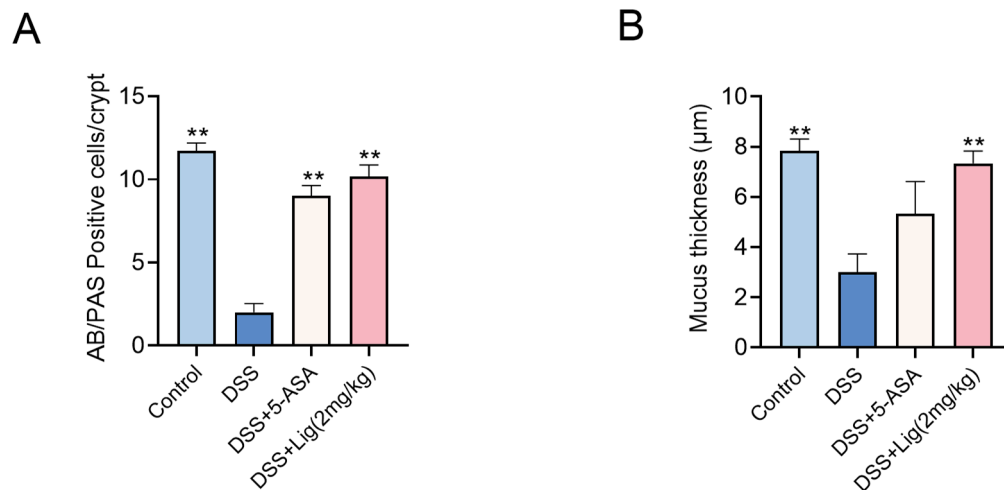

**Supplementary Figure S4.** (A) The quantification of AB/PAS Positive cells/crypt in colon tissue. (B) Mucus thickness of colon tissue. Data are presented as means  $\pm$  SEM. \*  $p < 0.05$  and \*\*  $p < 0.01$  vs. DSS group, ns means  $p > 0.05$  vs. DSS group,  $n = 5$ .

**Table S1.** The composition of diet for mice.

| <b>Energy Ratio</b>      |              |
|--------------------------|--------------|
| protein                  | 20.6%        |
| fat                      | 12.0%        |
| carbohydrate             | 67.4%        |
| gross heat               | 3530 Kcal/kg |
| <b>Vitamin</b>           |              |
| Vitamin A, IU/kg         | ≥7000        |
| Vitamin D, IU/kg         | ≥800         |
| Vitamin E, IU/kg         | ≥60          |
| Vitamin E, mg/kg         | ≥3.0         |
| Vitamin B1, mg/kg        | ≥8           |
| Vitamin B2, mg/kg        | ≥10          |
| Vitamin B6, mg/kg        | ≥6           |
| Vitamin B12, mg/kg       | ≥0.02        |
| niacin, mg/kg            | ≥45          |
| pantothenic acid, mg/kg  | ≥17          |
| folacin, mg/kg           | ≥4.0         |
| biotin, mg/kg            | ≥0.10        |
| bilineurine, mg/kg       | ≥1250        |
| Vitamin C, mg/kg         | /            |
| <b>Mineral Substance</b> |              |
| Magnesium (Mg), g/kg     | ≥2.0         |
| Potassium (K), g/kg      | ≥5.0         |
| Sodium (Na), g/kg        | ≥2.0         |
| Ferrum (Fe), mg/kg       | ≥100         |
| Manganese (Mn), mg/kg    | ≥75          |
| Copper (Cu), mg/kg       | ≥10          |
| Zinc (Zn), mg/kg         | ≥30          |
| Iodine (I), mg/kg        | ≥0.5         |
| Selenium (Se), mg/kg     | 0.1~0.2      |
